# Supplementary material for: Booting Heat Stress Alters Leaf Photosynthesis, Growth Rate, Phenology and Yield in Rice
Source: Preprints.org preprint supplement (doi:10.20944/preprints202306.0444.v1), 2023-06-06
Supplement: Supplementary file 1 [file supplementary]

33 Moo 19, Tambon Sila,  
Amphur Muang, Khon Kaen,  
Thailand 40000.

20th May 2023

**Title:** Booting heat stress alters leaf photosynthesis, growth rate, phenology and yield in rice

**Authors:** Natthamon Chandarak, Prasit Somjinda, Phanupong Phoncharoen, Poramate Banterng, Worasitikulya Taratima, Piyada Theerakulpisut and Anoma Dongsansuk

This is to certify that I have proofread and edited the above paper.

I am a native speaker of English from the United Kingdom. I graduated in B.Sc. Physics (Durham, UK) and M.Sc. Applied Sciences in Medicine (Alberta, Canada). I have been teaching and researching at the Faculty of Science, Khon Kaen University for over 30 years. I am now retired, and have edited hundreds of academic papers,

Yours Sincerely,

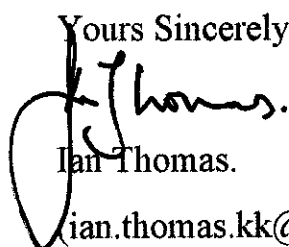A handwritten signature in black ink, appearing to read 'Ian Thomas', with a large, stylized loop at the beginning.

Ian Thomas.

(ian.thomas.kk@gmail.com)
